# Supplementary material for: A Novel LncRNA MSTRG.310246.1 Promotes Differentiation and Thermogenesis in Goat Brown Adipocytes
Source: MDPI journal article supplement (doi:10.3390/genes14040833), 2023-03-30
Supplement: s1 [file s1]

**Table S2. The full length of goat MSTRG.310246.1**

CCACTCACTCTTGCCAGCTACATTTCTCGCTGGCATCTCCCAGCAGGTTCTGATCCAAA  
AGTGTGTGAGATTTTTGGGAACTCAGTTTCCATTTCCCAATGGAAGAATTTTGTAACTCT  
CTGGGTTCTGCACTTCTGAACTTGAACCTTGAACCCTGTAGGCAGTGAGTAAACAGTG  
ACAGTTACACGTCAGGGTAGTGACAGTGTTTGCTTGGCCACCATCACTGGGGTTTGGT  
AAAGGCCAAAATGAAGTAATGCAGATGCAAGCAAAGAAGGAAGGCAGCTAATCCATGT  
GTGGGTGAAAGAAGCTCGGAGTGAGAGCATTATCCTACTCCTGCACATGCAACAACAA  
CAACAACAAAATGAGAGCCCCCGTCCTGGAAAAGACAGATGCGTGCAAGAATGTTTAT  
GGAAGATTCACCTCAGGTGATAAAAATCCAGAAACAACCCAGATACCCAGCAGCAATA  
GCATGGGTAAATAAATCGTGGTTTTCGCCAGACAGTGTAATACTACTCAGAAAAAAGTA  
AACTACGGACACATGCAACATGGGTAGATCTTACAGATGTTATGTTGAGCAAAAAGGAA  
GCCAAACAGACACACAAAAGTAAATATACCGCATGATTTCAATAACAGAAGTGAGGCT  
TATTGGTGGCAGTGATGATAATCACTAGAAATACACAAAGAAGCCCCCAGAGTGGGCG  
TGTGTGTGAAAGTGCATCGCTCTGTATGCTTAAGATTATACTCTTAACAATCTTTGCTCC  
CTGCATGTTAAGCCTCAATTTTAAGAAATCAAACTTAAAAAGAGATCCTTGATGTCTGA  
GATCTTGACAGGCCTGCCTGGACACTGGGACCTCAAAGACCAGAAAGGACTGTCCTG  
CGGCACACATTAGCAGATGCCTGAATATGCAAATGAGAGCACTTACGGAAGACTTCAG  
TGTCAGATGCTAATCTTCCGCTTCGGAGAAGGAGCTGGGGAGGTCAATAGCTTTTG  
AGTGGACAGTTTTTTAACTTGGGGGAGGCTGGTTCCTGACCCTTTGAAAAGCTGATG  
ACAGCTGCAAACCTTTTTTTTTTTTTTCCAGAAAAATGCACACACACCTAAAGAGTGGTA  
AAGAATATCAGTCTTGGAGCTTCCTAAGCCCTTGTAACCAACTCCTGACCCACATAGATT  
AAGAAAAATGTATCCGCAATTTTGAACAAGGTAAAAGGATATCTGAAATGTCCTTTCA  
CTGGCTCACTGTCTAACAGGCCGCCAGGGATTAGCTCTTTCTCTAGGGATTTGTGTCT  
TGAATAAGCTCTAGATGCTACAAAGTTACATGTAACCTGGTAGATTTTTGGCCAACAAAA  
ATGCAAGGGTTAAACAGATCACAAATAAGGACCCACCTACAGCACACGGAACCTCTAC  
TCAGTACTCTGTAATGGCCTATATGGGGAAAGAATCTAAAAAAGAGTGGATATATGTATA  
TGTATAACTGATTCACCTTGCTGCTCACCTGAAATAACGCAACATTGTAAATCAGCTATA  
TGCCAATAAACTTTTTTAAAAAAGAAAAAGAAATGCAAGGATTTCTATTGGTTGAAAA  
AAAGGATTTTCCCCAAAGTTGTGGTTTTGTGGCCCCGTAGAATATTAACCAGTTTTTTA  
AATCTATTTAGGAAAATCAGATTTTTGTCTATCTTCCTGTGCAGGGAAACCTCCAGCTCT

TCCCCATTGTATATTTCTTCTTGTTTGTTTTCTTTACTGCTCACAGGAAATATTTCACTTT  
CTTTTGGAAAGAATTTCTGGTTTAAACTTTATTTATTTATTTGCCACACTGCATGACA
