# Supplementary material for: A Novel LncRNA MSTRG.310246.1 Promotes Differentiation and Thermogenesis in Goat Brown Adipocytes
Source: MDPI journal article supplement (doi:10.3390/genes14040833), 2023-03-30
Supplement: s1 [file s1]

Table S1. Primers used for real-time RT/PCR.

| Gene symbol                          | Sequence 5'-3'                                                        | Tm( °C) | Size(bp) |
|--------------------------------------|-----------------------------------------------------------------------|---------|----------|
| UCP1                                 | TCCTGTCTTTGATCGCCTCT<br>GAACAGTCCATGTGCCAGTG                          | 61.3    | 135      |
| PGC1 $\alpha$                        | CCACAAATGATGACCCTC<br>GGTTTGGCTTGTAGATGTT                             | 60      | 103      |
| ELOVL6                               | TGTCAGAGATGACAAGGGCT<br>CTTGGTTCGCACGGATTCTC                          | 62.5    | 121      |
| PPAR $\gamma$                        | GTGTCACCTCCTGAACGAAAT<br>GGAAATGCTGGAGAAGTCAA                         | 60      | 156      |
| PPAR $\alpha$                        | TGCAAGCTTGGACTTGAACG<br>ATGAAGCCATTCCCGTAGGC                          | 60      | 126      |
| FABP4                                | ACTGGGATGGGAAATCAACC<br>CCTTGGCTTATGCTCTCTCG                          | 60      | 117      |
| CPT1 $\alpha$                        | CGTCGCCTTCCAGTTCACAG<br>CACAACCACGATGAGCCAACT                         | 53.7    | 181      |
| ATGL                                 | TCCTGAGAACTTCGCACCTG<br>GCAGCCACACACAAGTGAAG                          | 60      | 142      |
| CIDEA                                | TCAAGAGTGGATAGGGGGCA<br>CCAGTCCCTGATAGTCGCTC                          | 60      | 147      |
| Full length of<br>MSTRG.310246<br>.1 | CGGGATCCCCACTCACTCTTGCCAGCTA<br>ATAAGAATGCGGCCGCTGTCATGCAGTGT<br>GGCA | 63      | 1841     |
| MSTRG.310246<br>.1                   | GCTCCCTGCATGTTAAGCCT<br>GGCATCTGCTAATGTGTGCC                          | 62.5    | 142      |
| U6                                   | GGAACGATACAGAGAAGATTAGC<br>TGGAACACTTCTGGAATTTGCA                     | 60      | 68       |
| GAPDH                                | GCAAGTTCCACGGCACAG<br>GGTTCACGCCCATCACAA                              | 61.3    | 249      |
| PFDN5                                | GCTTATTGACGTGGGAACT<br>TGCAGAGCTGGCTGGATT                             | 60      | 120      |
